# Supplementary material
Source: PubMed Central journal article supplement (PMC4837998)

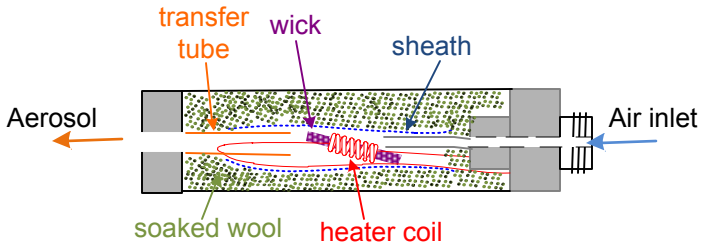

**Figure S1:** Anatomy of a typical ECIG cartridge

Supplement: supp_ntu174_Figure_S1.pdf [file supp_ntu174_Figure_S1.pdf]

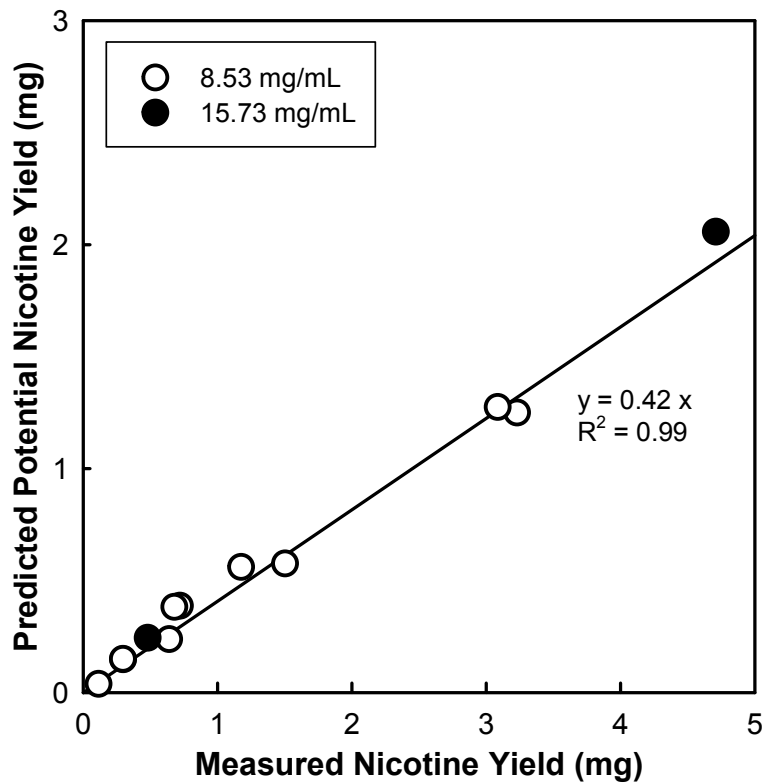

**Figure S2:** Predicted potential nicotine yield vs. measured nicotine yield for all conditions.

Supplement: supp_ntu174_Figure_S2.pdf [file supp_ntu174_Figure_S2.pdf]
